# Supplementary material
Source: Springer Nature journal article supplement (https://www.springermedizin.de/resource/supplementary/13020_2009_67_MOESM2_ESM.pdf/9640994)

(a)

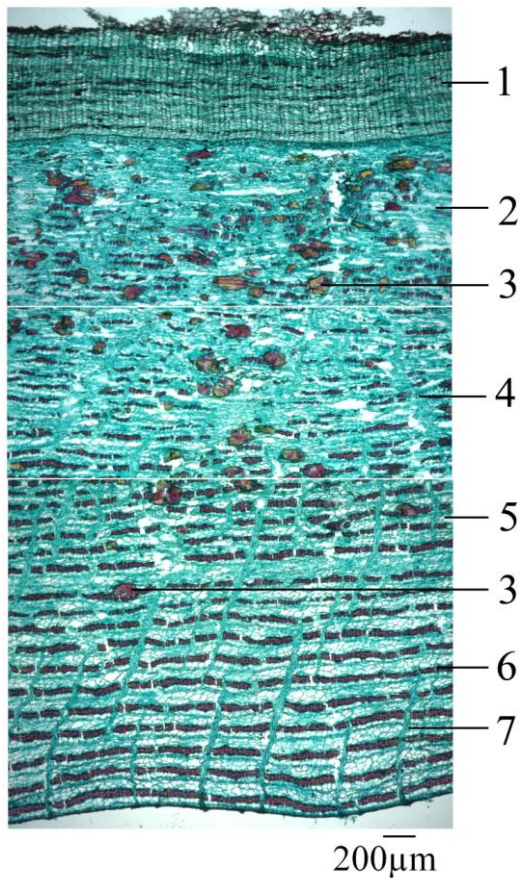

(b)

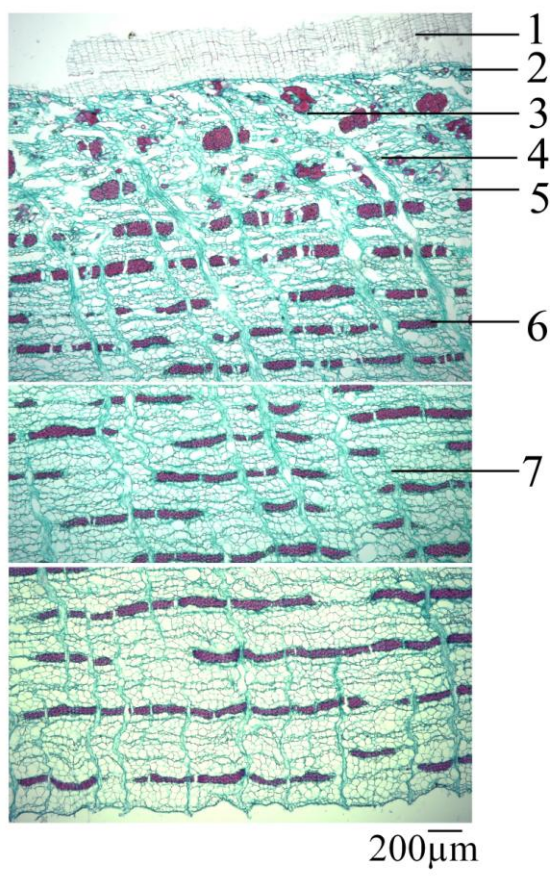

Supplement: MOESM2 [file 9640994]
